# Supplementary material for: Collective radioresistance of T47D breast carcinoma cells is mediated by a Syncytin-1 homologous protein
Source: PubMed Central journal article supplement (PMC6353071; doi:10.1371/journal.pone.0206713), 2019-01-30
Supplement: pone.0206713.s001.pdf [file pone.0206713.s001.pdf]

## **Supplementary Information**

### **Collective radioresistance of T47D breast carcinoma cells is mediated by a Syncytin-1 homologous protein**

Roberto Chignola<sup>1,\*</sup>, Michela Segal<sup>1</sup>, Barbara Molesini<sup>1</sup>, Anna Baruzzi<sup>2</sup>, Sabrina Stella<sup>3</sup>,  
Edoardo Milotti<sup>3</sup>

<sup>1</sup>Department of Biotechnology, University of Verona, Strada Le Grazie 15, 37134, Verona, Italy

<sup>2</sup>Department of Medicine, University of Verona, Piazzale L. Scuro 10, 37134 Verona, Italy

<sup>3</sup>Department of Physics, University of Trieste, Via Valerio 2, 34127 Trieste, Italy

\*roberto.chignola@univr.it

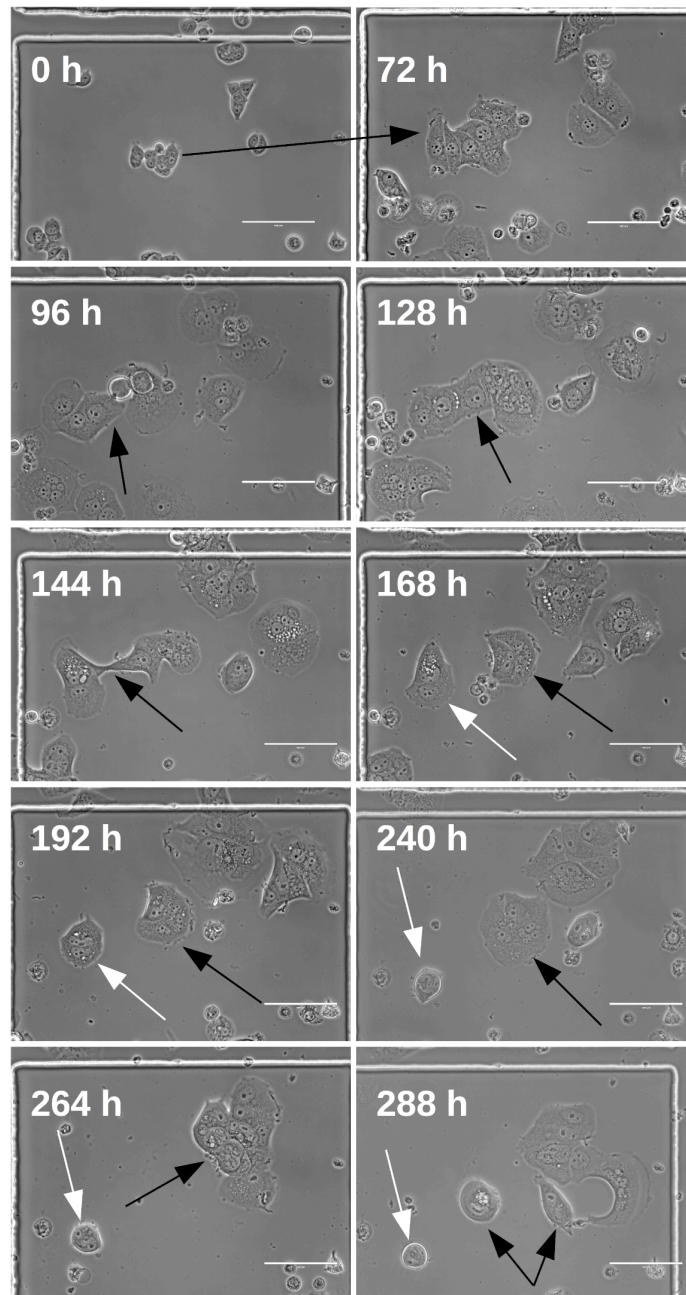

**Figure A. Cytological analysis of T47D monolayers after irradiation with 8Gy.** Typical examples of microphotographs taken at the indicated post-irradiation times. The microphotograph at 0 hours was taken within 15 min from irradiation. A group of cells is clearly visible. After 72 hours post-irradiation these cells showed an enlarged cell volume (black arrow). At 72 hours some of the individual cell bodies were visible but at later times (96 and 128 hours) cell fusion and the formation of giant cells with multiple nuclei was evident (black arrow). At 144 hours (black arrow), however, a division event took place that produced two giant multinucleated cells. One of these giant cells shrank at later times (white arrows) but the other apparently fused again with neighbour giant cells (black arrows) to form a lump of cells (264 hours, black arrow). Expulsion of cell material from the cluster was then observed after 288 hours post-irradiation. In all panels the reference bar is 100 μm long.

CLUSTAL O(1.2.4) multiple sequence alignment

|                         |                                                                                                                                         |            |
|-------------------------|-----------------------------------------------------------------------------------------------------------------------------------------|------------|
| T47Dclone<br>Syncytin-1 | AGCCCCGCAACAAAAGAGTACCCATTCTCCTTTTGTACCGGAGCAGGAGTCTAGGCA<br>AGCCCCGCAACAAAAGAGTACCCATTCTCCTTTTGTATAGGAGCAGGAGTCTAGGTC<br>*****         | 60<br>60   |
| T47Dclone<br>Syncytin-1 | GACTAGGTACTGGCATTGGTGGTATCACAACTCTACTCAGTTCTACTATAAACTATCTC<br>CACTAGGTACTGGCATTGGCGGTATCACAACTCTACTCAGTTCTACTACAACTATCTC<br>*****      | 120<br>120 |
| T47Dclone<br>Syncytin-1 | AAGAACTAAATGGTGACATGGAATGGGTGCGCAACTCACCAGTCACCTTGAAGATCAAC<br>AAGAACTAAATGGGGACATGGAACGGGTGCGCGACTCCCTGGTCACCTTGAAGATCAAC<br>*****     | 180<br>180 |
| T47Dclone<br>Syncytin-1 | TTAACTTCTAGCAGCAGTAGTCCTTCAAATCAAAGAGTTTGAAGTCTGCTAACTGCGC<br>TTAACTTCTAGCAGCAGTAGTCCTTCAAATCAAAGAGCTTTAGACTTGTAACTGCGC<br>*****        | 240<br>240 |
| T47Dclone<br>Syncytin-1 | AAAGAGGGGAAACCTGTTTATTTTATAGGGGAAGAATGCTCTTATTATGTTAATCAATCCG<br>AAAGAGGGGAAACCTGTTTATTTTATAGGGGAAGAATGCTCTTATTATGTTAATCAATCCG<br>***** | 300<br>300 |
| T47Dclone<br>Syncytin-1 | GAATCGTCACCGAGAAAGTTAAAGAAATTCGAGATCGAATACAACGTAGAGCAGAGGAGC<br>GAATCGTCACTGAGAAAGTTAAAGAAATTCGAGATCGAATACAACGTAGAGCAGAGGAGC<br>*****   | 360<br>360 |
| T47Dclone<br>Syncytin-1 | TTCAAACACCAGACCTGGGACCTCCTCAGCCAATGGGTGCTCTGGATTCTCCTTTCT<br>TTCAAACACTGGACCTGGGGCTCCTCAGCCAATGGATGCCCTGGATTCTCCCTTTCT<br>***           | 420<br>420 |
| T47Dclone<br>Syncytin-1 | TAGGACCTCTAGCAGTTATAATATTGTTACTTCTCTTTGGACCTGCATCTTTAACCTGC<br>TAGGACCTCTAGCAGTTATAATATTGTTACTTCTCTTTGGACCTGTATCTTTAACCTCC<br>*****     | 480<br>480 |
| T47Dclone<br>Syncytin-1 | TTGTTAAGTTTGTCTCTTCCAGAATTGAAGCTGTAAGCTACAAATGATTCTTCAAATGG<br>TTGTTAAGTTTGTCTCTTCCAGAATCGAAGCTGTAAGCTACAAAT-----GG<br>*****            | 540<br>528 |
| T47Dclone<br>Syncytin-1 | AGCCCCAGAGGCAGTCCATGACTAAAATCTACTGCGGACCTTAGACCGGCTGCCAGCC<br>AGCCCCAAGATGCAGTCCAAGACTAAGATCTACCGCAGACCCCTGGACCGGCTGTAGCC<br>*****      | 600<br>588 |
| T47Dclone<br>Syncytin-1 | CATGCTCAATGTTGATGACATCCAAGGTACCCCTCCGGAGGAAATCTCACTGCACAAC<br>CACGATCTGATGTTAATGACATCAAAGGCACCCCTCCTGAGGAAATCTCAGTGCACAAC<br>**         | 660<br>648 |
| T47Dclone<br>Syncytin-1 | TCCTACTGTGCCCAATTAGCAGGAAGCAGTTAGAGCGGTATCGACAGACCTCCCCAA<br>CTCTACTACGCCCAATTAGCAGGAAGCAGTTAGAGCGGTATCGACAGACCTCCCCAA<br>*****         | 720<br>708 |
| T47Dclone<br>Syncytin-1 | CAGCACTTAGGTTTTCTGATGAGAGGGGAACTGAGAGACGGGACTAGTTGGATTTCCT<br>CAGCACTTAGGTTTTCTGTTGAGATGGGGACTGAGAGACAGGACTAGCTGGATTTCCT<br>*****       | 780<br>768 |
| T47Dclone<br>Syncytin-1 | AGGCCAACTAAGAATCCATAAGCCTAGCTGGGAAGGTGACAGCATCCACCTTTAAACACG<br>AGGCTGACTAAGAATCCATAAGCCTAGCTGGGAAGGTGACACATCCACCTTTAAACACG<br>****     | 840<br>828 |
| T47Dclone<br>Syncytin-1 | GGGCTTGCAACTTAGCTCACACCAGCAATCAGGTAGTAAAGAGAGCTCACTAAACTGC<br>GGGCTTGCAACTTAGCTCACACCTGACCAATCAG-----AGAGCTCACTAAACTGC<br>*****         | 900<br>879 |
| T47Dclone<br>Syncytin-1 | TAACTAGGCTAAAACAGGAGGTAAGAAATAGCCAATCATCTATCTCTGAGAGCACAGC<br>TAATTAGGCAAAAACAGGAGGTAAGAAATAGCCAATCATCTATTGCTGAGAGCACAGC<br>**          | 960<br>939 |
| T47Dclone<br>Syncytin-1 | GGGAGGGACAATGATCGGGA<br>AGGAGGGACAATGATCGGGA<br>*****                                                                                   | 980<br>959 |

**Figure B. Sequence analysis of the 980 bp-long cDNA fragment amplified by RT-PCR in T47D cell extracts.** The amplified DNA fragment encompasses a region of 683 nt of the 3' terminal coding region and a portion 276 nt of the 3'untranslated region of the Syncytin-1 (AF208161) transcript. Alignment between the two DNA sequences was carried out using Clustal Omega software hosted at <https://www.ebi.ac.uk>.

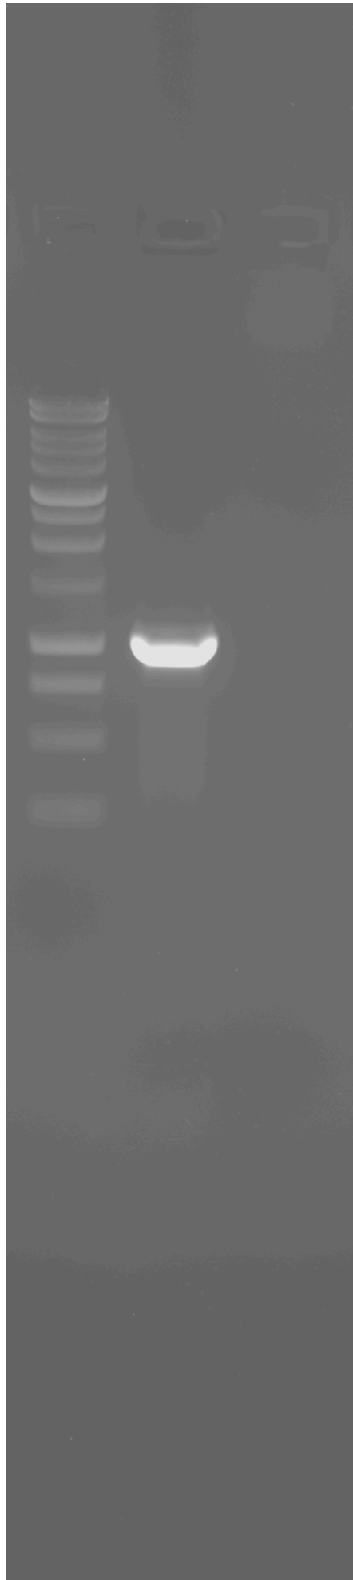

**Figure C. Gel electrophoresis of the DNA fragment amplified by RT-PCR in extracts of T47D cells.** Picture of the full-length gel from which we cropped the image reported in Fig.4A in the main text.



**Table A. Experimental data shown in Fig.1a, main text.** Number of cell colonies surviving radiation treatments

| Gy | cells/well |    |     |    |     |     |     |     |      |   |      |   |
|----|------------|----|-----|----|-----|-----|-----|-----|------|---|------|---|
|    | 100        |    | 200 |    | 400 |     | 800 |     | 1600 |   | 3200 |   |
| 0  | 25         | 27 | 59  | 48 | 110 | 113 |     |     |      |   |      |   |
| 2  | 10         | 22 | 24  | 27 | 66  | 76  | 110 | 106 |      |   |      |   |
| 4  | 2          | 3  | 9   | 6  | 22  | 16  | 37  | 32  |      |   |      |   |
| 6  |            |    |     |    | 0   | 1   | 3   | 2   | 5    | 5 |      |   |
| 8  |            |    |     |    |     |     |     |     | 1    | 1 | 2    | 3 |

**Table B. Experimental data shown in Fig.1b, main text.** Limiting dilution assays with non irradiated cells: number of wells with no proliferating cells / total number of seeded wells.

| well geometry | cells/well |         |         |         |        |
|---------------|------------|---------|---------|---------|--------|
|               | 1.25       | 2.5     | 5       | 10      | 20     |
| F             | 53 / 92    | 48 / 92 | 21 / 92 | 10 / 92 | 1 / 88 |
| V             | 60 / 96    | 45 / 92 | 32 / 92 | 9 / 92  | 1 / 60 |

**Table C. Experimental data shown in Fig.1c, main text.** Number of wells with proliferating cells surviving radiation treatment with 8 Gy. For each condition 96 wells were seeded with the indicated number of cells/well.

| well geom. |       | cells/well |       |        |       |      |      |      |      |
|------------|-------|------------|-------|--------|-------|------|------|------|------|
|            |       | 39.06      | 78.12 | 156.25 | 312.5 | 625  | 1250 | 2500 | 5000 |
| F          | exp.1 | 3          | 5     | 9      | 9     | 34   | 45   | 68   | 84   |
|            | exp.2 | 2          | 3     | 9      | 12    | 39   | 53   | 67   | 85   |
|            | mean  | 2.5        | 4     | 9      | 10.5  | 36.5 | 49   | 67.5 | 84.5 |
| V          | exp.1 | 10         | 22    | 31     | 41    | 66   | 78   | 88   | 93   |
|            | exp.2 | 11         | 29    | 30     | 55    | 66   | 88   | 90   | 96   |
|            | mean  | 10.5       | 25.5  | 30.5   | 48    | 66   | 83   | 89   | 94.5 |

**Table D. Experimental data shown in Fig.2b, main text.** Diameters ( $\mu\text{m}$ ) of cell rings outgrowing sham-irradiated or irradiated spheroids at specific sampling times. Different cell rings (R) are labelled with a progressive number.

| Time (hours) | 0 Gy   |        |        |        |        | 8 Gy   |        |        |        |        |
|--------------|--------|--------|--------|--------|--------|--------|--------|--------|--------|--------|
|              | R1     | R2     | R3     | R4     | R5     | R6     | R7     | R8     | R9     | R10    |
| 24           | 120.89 | 114.83 | 118.23 | 122.02 | 90.55  | 40.00  | 72.83  | 121.51 | 38.15  | 107.55 |
| 48           | 227.92 | 198.44 | 22061  | 199.41 | 164.85 | 87.02  | 120.77 | 173.40 | 85.94  | 157.91 |
| 120          | 430.14 | 363.68 | 423.89 | 399.32 | 351.55 | 234.30 | 285.96 | 344.69 | 223.01 | 348.60 |
| 144          | 476.33 | 428.59 | 504.61 | 453.96 | 417.83 | 285.48 | 328.59 | 377.14 | 259.68 | 387.28 |
| 168          | 533.22 | 489.28 | 550.24 | 510.98 | 476.61 | 286.81 | 354.37 | 394.10 | 285.16 | 397.91 |
| 192          | 575.87 | 523.36 | 618.09 | 585.12 | 541.80 | 280.27 | 371.14 | 400.23 | 293.57 | 410.52 |
| 216          | 619.95 | 567.77 | 642.82 | 629.90 | 583.44 | 281.96 | 377.01 | 398.63 | 294.59 | 417.40 |
| 288          | 719.61 | 669.54 | 796.83 | 810.88 | 746.73 | 259.58 | 360.07 | 347.30 | 275.76 | 364.36 |
| 312          | 800.44 | 732.34 | 887.47 | 897.40 | 820.77 | 288.84 | 371.95 | 360.44 | 309.78 | 406.96 |
| 336          | 842.84 | 775.60 | 938.16 | 991.41 | 884.99 | 303.10 | 400.26 | 345.99 | 355.78 | 427.78 |
| 360          | 898.91 | 811.05 | 1016.3 | 1071.3 | 974.35 | 323.82 | 385.81 | 337.10 | 361.77 | 428.17 |
| 384          | 916.77 | 843.51 | 1057.9 | 1122.8 | 1015.1 | 287.47 | 382.31 | 332.71 | 347.37 | 410.52 |
| 456          | 1085.2 | 940.50 | 1239.0 | 1341.3 | 1211.7 | 312.35 | 401.90 | 365.13 | 365.80 | 420.78 |
| 504          | 1174.9 | 1080.5 | 1385.7 | 1494.8 | 1429.0 | 316.33 | 432.10 | 413.98 | 360.39 | 398.23 |
| 552          | 1331.1 | 1151.2 | 1508.2 | 1640.7 | 1578.8 | 313.29 | 438.04 | 444.92 | 388.90 | 458.71 |
| 624          | 1549.3 | 1283.0 | 1647.0 | 1817.6 | 1700.7 | 336.21 | 532.26 | 545.77 | 430.59 | 458.23 |
| 672          | 1591.0 | 1329.9 | 1730.4 | 1980.7 | 1938.2 | 341.08 | 596.84 | 620.37 | 455.71 | 472.45 |
| 720          | 1852.6 | 1474.1 | 1889.7 | 2135.3 | 2144.9 | 353.97 | 659.48 | 725.15 | 482.00 | 532.77 |
| 792          | 2040.0 | 1567.7 | 1970.8 | 2306.7 | 2376.7 | 358.59 | 766.28 | 847.32 | 542.85 | 559.49 |
| 888          | 2391.4 | 1768.0 | 2138.8 | 2480.1 | 2630.5 | 357.62 | 868.53 | 992.41 | 638.92 | 689.54 |
| 960          | 2506.7 | 1762.3 | 2088.8 | 2564.8 | 2159.1 | 320.56 | 949.49 | 1102.8 | 717.04 | 795.10 |

**Table E. Experimental data shown in Fig.5a, main text.** Total number of cytoplasmic bridges observed in independent randomly-selected microphotographs (see S4 Fig. below) of cultures of non-irradiated alive cells (A) treated with dead cell bodies (D) from irradiated cultures at different D:A ratios. CT=control samples, i.e. A cells without D dead cell bodies;  $\alpha$ HERV=treatment with anti-HERV antibodies.

| CT |               | D:A 1:1 |               | D:A 4:1 |               |
|----|---------------|---------|---------------|---------|---------------|
|    | $\alpha$ HERV |         | $\alpha$ HERV |         | $\alpha$ HERV |
| 4  | 3             | 17      | 15            | 25      | 19            |
| 9  | 5             | 20      | 11            | 38      | 16            |
| 3  | 2             | 21      | 14            | 22      | 21            |
| 14 | 3             | 18      | 13            | 20      | 15            |
| 5  | 4             | 17      | 16            | 22      | 21            |
| 9  | 7             | 22      | 17            | 24      | 19            |
| 7  | 3             | 11      | 5             | 14      | 20            |
| 8  | 0             | 12      | 10            | 24      | 6             |
| 6  | 1             | 16      | 6             | 19      | 15            |
|    | 0             |         |               |         |               |
|    | 1             |         |               |         |               |
|    | 0             |         |               |         |               |
|    | 3             |         |               |         |               |
|    | 0             |         |               |         |               |
|    | 1             |         |               |         |               |
|    | 0             |         |               |         |               |
|    | 0             |         |               |         |               |
|    | 0             |         |               |         |               |

**Table F. Experimental data shown in Fig.5b, main text.** Total number of cytoplasmic bridges observed in independent randomly-selected microphotographs of cultures of non-irradiated alive cells (A) treated with: dead cell bodies (D) from irradiated cultures at 1:1 D:A ratio or with cell-free supernatants from irradiated cultures (SN). CT=control samples, i.e. A cells without D dead cell bodies. Cytoplasmic bridges in cell cultures irradiated with a dose of 8 Gy are also given (cells 8Gy).

|                  |    |    |    |    |    |    |    |    |    |   |
|------------------|----|----|----|----|----|----|----|----|----|---|
| <b>CT</b>        | 7  | 6  | 3  | 6  | 9  | 6  | 7  | 7  | 8  |   |
| <b>D:A 1:1</b>   | 13 | 11 | 12 | 13 | 24 | 10 | 8  | 16 | 17 | 7 |
| <b>SN</b>        | 4  | 7  | 8  | 1  | 4  | 3  | 5  | 1  | 10 | 6 |
| <b>cells 8Gy</b> | 14 | 20 | 20 | 10 | 16 | 11 | 14 | 11 | 16 |   |

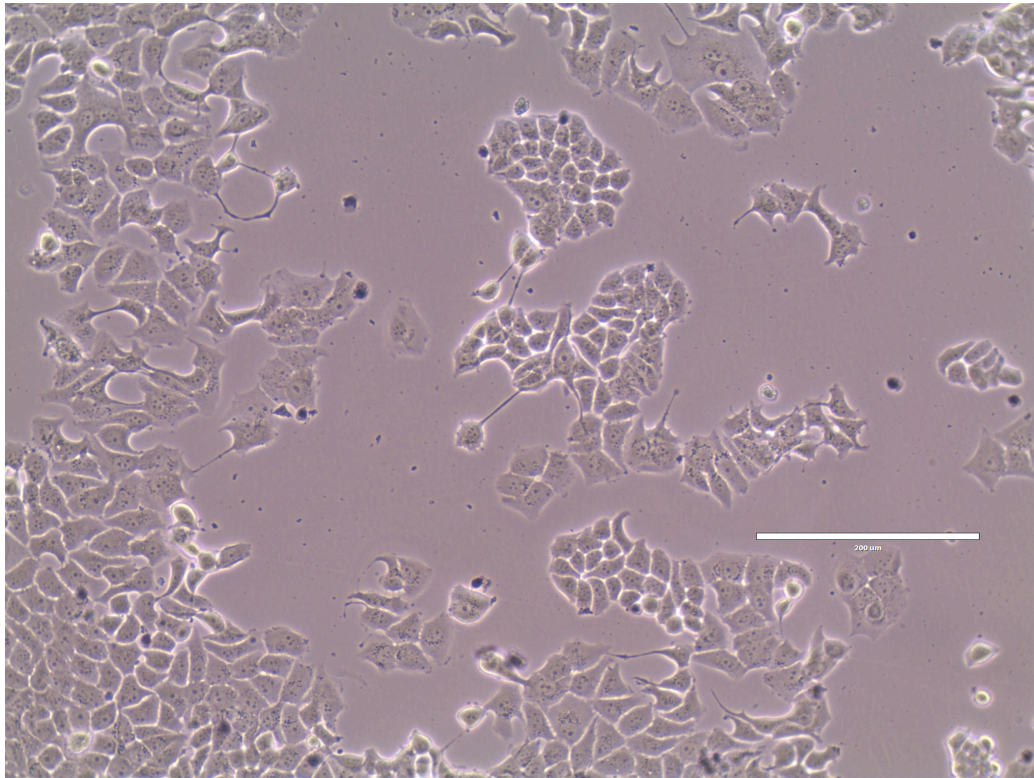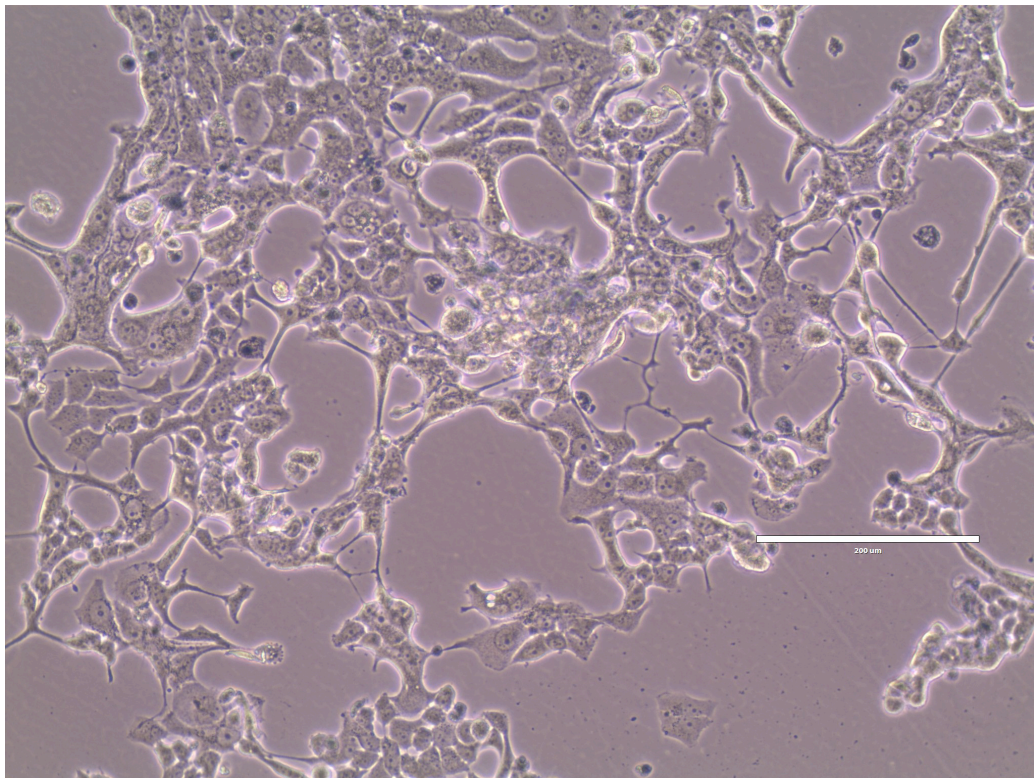

**Figure D. Microphotographs from cytoplasmic bridges counting experiments.** Two representative examples are shown: top D:A 1:1; bottom D:A 4:1 (see the text in S5 Table). Scale bars are 200  $\mu\text{m}$  long.
